# Supplementary material for: Characterisation of the First Enzymes Committed to Lysine Biosynthesis in Arabidopsis thaliana
Source: PubMed Central journal article supplement (PMC3390394; doi:10.1371/journal.pone.0040318), 2012-07-05
Supplement: pone.0040318.s001.pdf [file pone.0040318.s001.pdf]

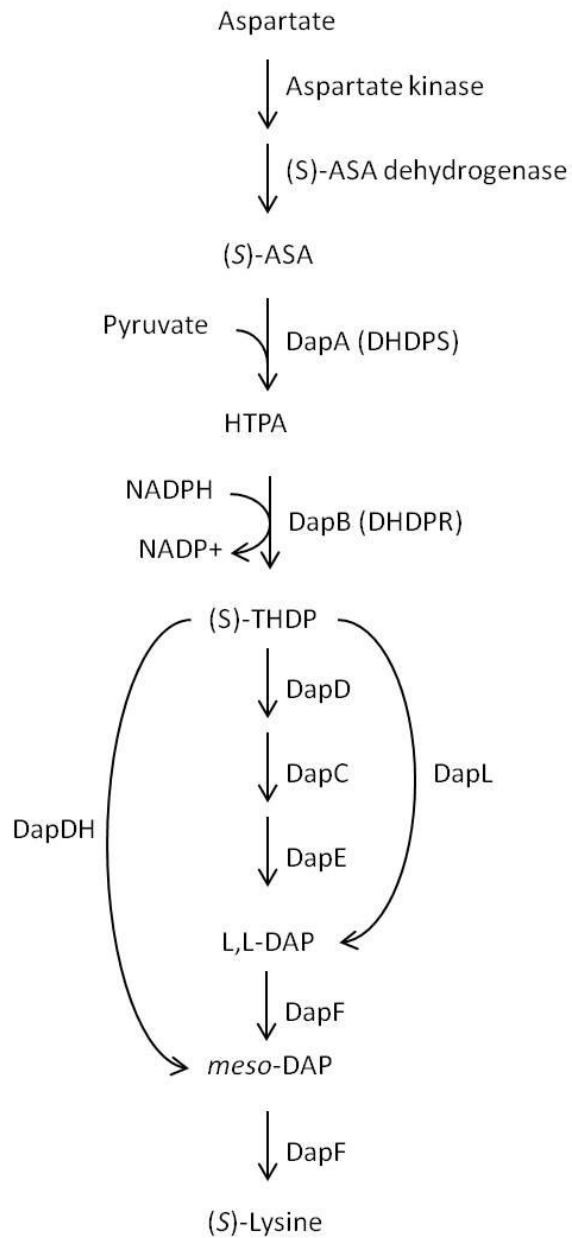

**Figure S1: Lysine biosynthesis pathways.** DapD, tetrahydrodipicolinate acylase; DapC, acyl-amino-ketopimelate aminotransferase; DapE, acyl-ketopimelate deacylase; DapF, diaminopimelate epimerase; LysA, diaminopimelate decarboxylase; DapDH, mesodiaminopimelatedehydrogenase; DapL, 1,1-diaminopimelate aminotransferase.
