# Supplementary material for: Characterisation of the First Enzymes Committed to Lysine Biosynthesis in Arabidopsis thaliana
Source: PubMed Central journal article supplement (PMC3390394; doi:10.1371/journal.pone.0040318), 2012-07-05
Supplement: pone.0040318.s002.pdf [file pone.0040318.s002.pdf]

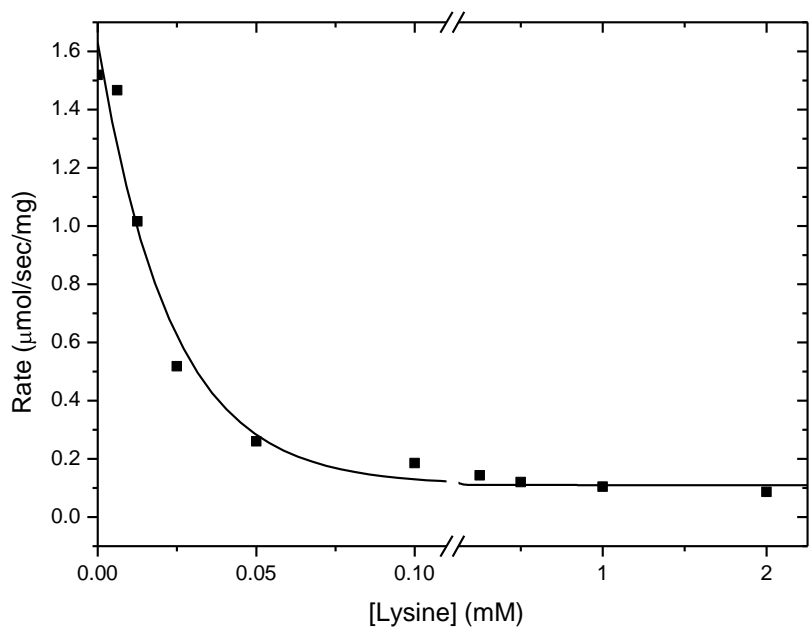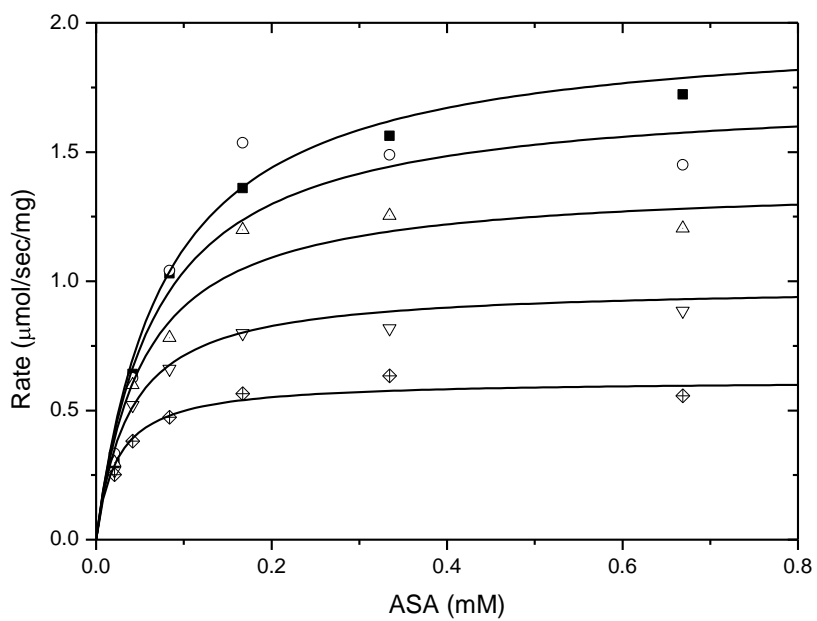

**Fig S2: Kinetics of *At-DHDPS2*.** Assays were carried out at varying concentrations of (S)-lysine (top panel), or varying concentrations of ASA and pyruvate (bottom panel).
