# Supplementary material for: Characterisation of the First Enzymes Committed to Lysine Biosynthesis in Arabidopsis thaliana
Source: PubMed Central journal article supplement (PMC3390394; doi:10.1371/journal.pone.0040318), 2012-07-05
Supplement: pone.0040318.s003.pdf [file pone.0040318.s003.pdf]

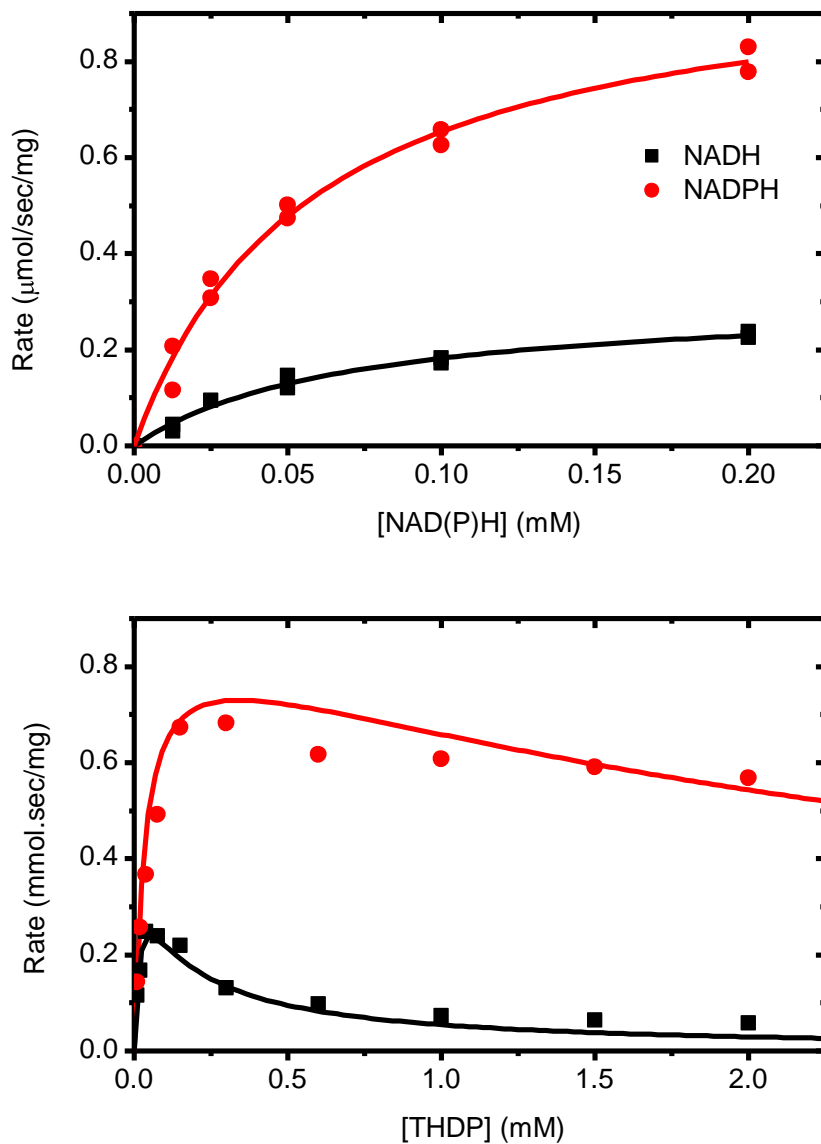

**Figure S3: Kinetics of *At-DHDPR2*.** Panel A) HTPA was fixed at 0.15 mM, and NAD(PH) concentrations were varied. Panel B) NAD(P)H concentrations were fixed at 0.16 mM and HTPA concentrations were varied.
