# Supplementary material for: Characterisation of the First Enzymes Committed to Lysine Biosynthesis in Arabidopsis thaliana
Source: PubMed Central journal article supplement (PMC3390394; doi:10.1371/journal.pone.0040318), 2012-07-05
Supplement: pone.0040318.s004.pdf [file pone.0040318.s004.pdf]

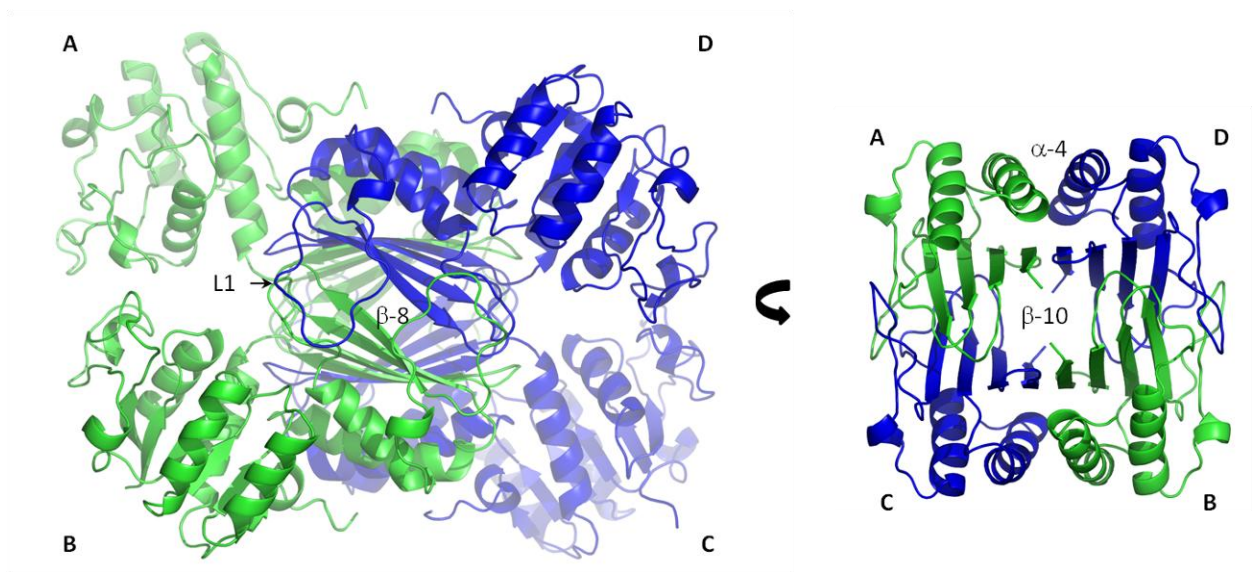

**Figure S4: Structure of bacterial DHDPR.** The structure of *Ec*-DHDPR (pdb: 1arz), showing the interface between  $\beta$ -8 and loop 1 (left panel) and the alternate interface involving  $\beta$ -10 and helix-4 (right panel, only the C-terminal domain shown).
