# Supplementary material for: Characterisation of the First Enzymes Committed to Lysine Biosynthesis in Arabidopsis thaliana
Source: PubMed Central journal article supplement (PMC3390394; doi:10.1371/journal.pone.0040318), 2012-07-05
Supplement: pone.0040318.s006.pdf [file pone.0040318.s006.pdf]

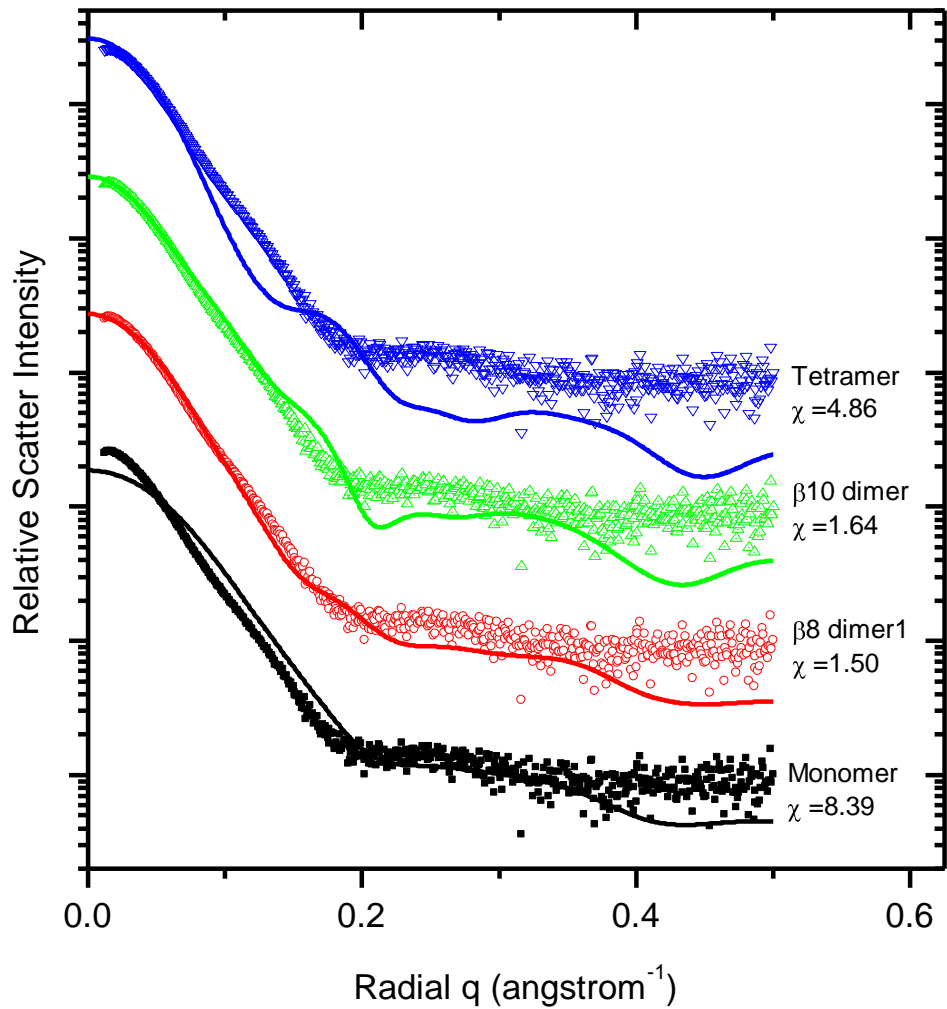

**Figure S6: X-Ray scattering of *At*-DHDPR2.** Data was collected and compared to the scattering calculated using CRY SOL for the monomer,  $\beta$ -10 dimer,  $\beta$ -8 dimer, and tetramer of *Ec*-DHDPR.
