# Supplementary material for: Characterisation of the First Enzymes Committed to Lysine Biosynthesis in Arabidopsis thaliana
Source: PubMed Central journal article supplement (PMC3390394; doi:10.1371/journal.pone.0040318), 2012-07-05
Supplement: pone.0040318.s007.pdf [file pone.0040318.s007.pdf]

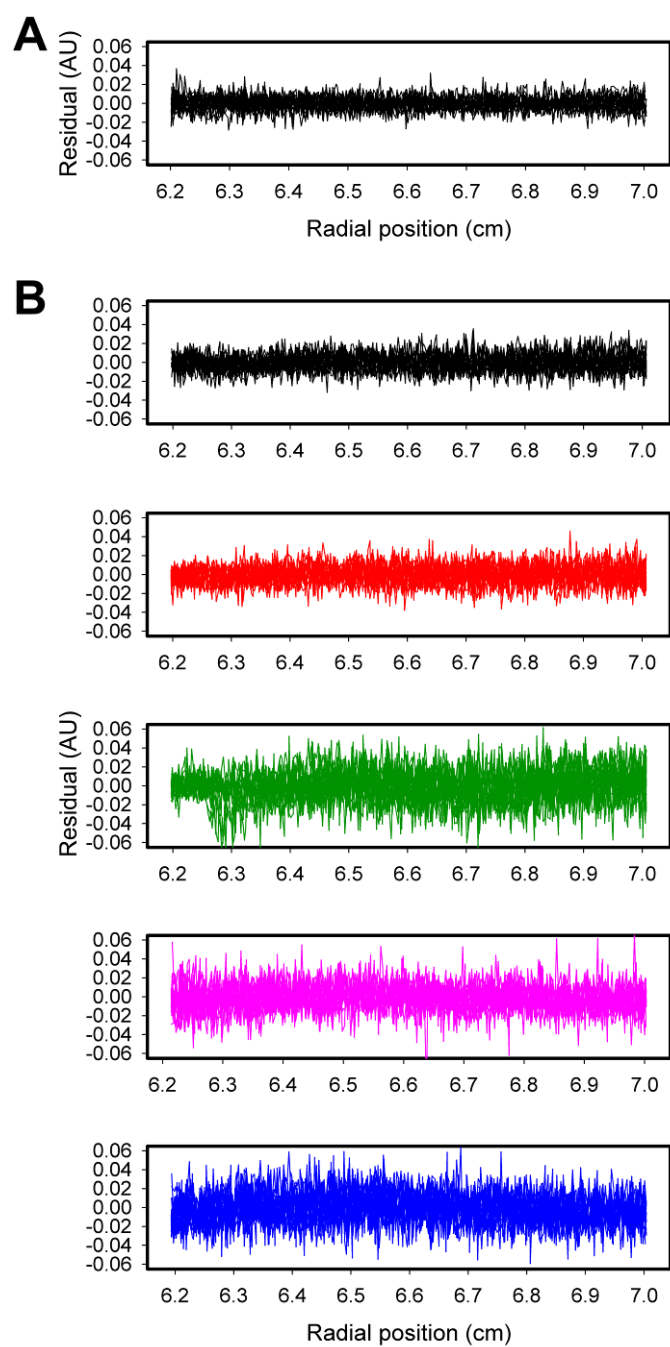

**Figure S7.** Residuals resulting from the  $c(s)$  distribution best fits shown in Figure 2 plotted as a function of radius from the axis of rotation. A) Residuals for the best fit of the sedimentation velocity data for *At*-DHDPS2 at a concentration of 0.75 mg.mL<sup>-1</sup>. B) Residuals for the best fit of the sedimentation velocity data for *At*-DHDPR2 at concentrations of 0.1 mg.mL<sup>-1</sup> (black), 0.2 mg.mL<sup>-1</sup> (red), 0.4 mg.mL<sup>-1</sup> (green), 0.8 mg.mL<sup>-1</sup> (pink), and 1.6 mg.mL<sup>-1</sup> (blue).
