# Supplementary material for: Characterisation of the First Enzymes Committed to Lysine Biosynthesis in Arabidopsis thaliana
Source: PubMed Central journal article supplement (PMC3390394; doi:10.1371/journal.pone.0040318), 2012-07-05
Supplement: pone.0040318.s008.pdf [file pone.0040318.s008.pdf]

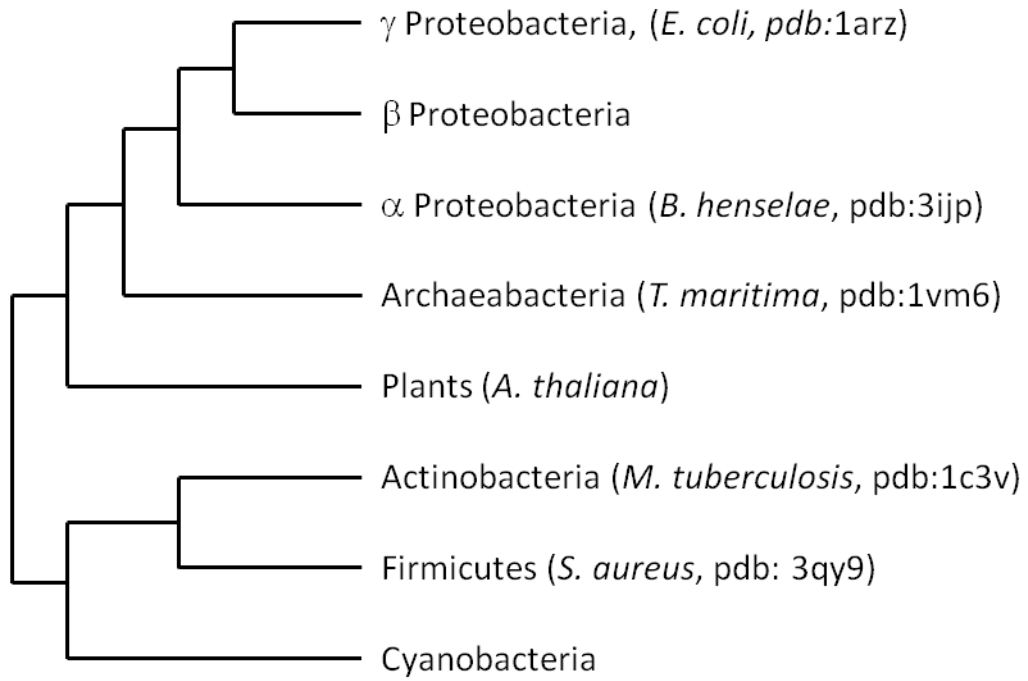

**Figure S8:** Representative phylogenetic tree of DapB orthologues based on Hudson, 2005 [5].
